# Supplementary material
Source: Research Square preprint supplement (doi:10.21203/rs.3.rs-7899622/v1)
Supplement: Supplementary file 1 [file 53c9dd7a343e949d5c148a16.docx]

This study investigates the spatio-temporal variability of seismicity along the southern Java megathrust, one of the most active subduction zones in the world. Using a probabilistic Bayesian–frequentist approach, we jointly analyze b-values (magnitude–frequency characteristics) and z-values (temporal seismicity changes) derived from a declustered 2005–2025 earthquake catalog. The integrated framework provides a statistically rigorous and transferable methodology to quantify stress accumulation and release processes in megathrust environments. The results highlight a complex relationship between seismic activation and quiescence, revealing that apparent seismic calmness does not always correspond to stress relaxation. These findings hold important implications for probabilistic seismic hazard assessment and early-warning monitoring strategies in subduction regions.

- An integrated Bayesian–frequentist framework is developed to jointly analyze b-values and z-values for the southern Java megathrust using a declustered 2005–2025 earthquake catalog.
- The Bayesian Markov Chain Monte Carlo (MCMC) approach with prior sensitivity testing ensures robust estimation of b-values and full quantification of uncertainty.
- Results reveal a homogeneous b-value distribution (1.1–1.2), while z-values show a strong west–east contrast: activation (negative z) in the west versus pronounced quiescence (positive z > +3) in the east.
- The eastern Java segment displays seismic quiescence without corresponding low b-values, implying that stress accumulation can occur even in domains with moderate seismicity levels.
- This finding challenges the universality of the b–z relationship, showing that it is highly dependent on local tectonic heterogeneity and slip behavior.
- The proposed framework provides a replicable probabilistic methodology for assessing spatio-temporal seismicity patterns in megathrust hazard monitoring.
- From a hazard perspective, the eastern Java segment emerges as a priority area for multi-parameter monitoring and mitigation, given its quiescence and inferred stress accumulation.
